# Supplementary material for: Achyranthis radix Extract-Loaded Eye Drop Formulation Development and Novel Evaluation Method for Dry Eye Treatment
Source: MDPI journal article supplement (doi:10.3390/pharmaceutics12020165), 2020-02-17
Supplement: s1 [file s1]

## Supplemental Results

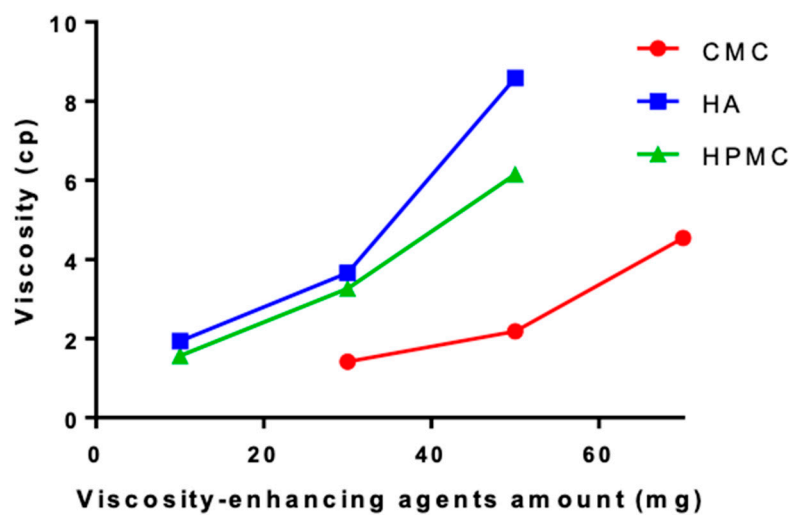

**Figure S1.** Effect of amount and type of lubricants on viscosity.

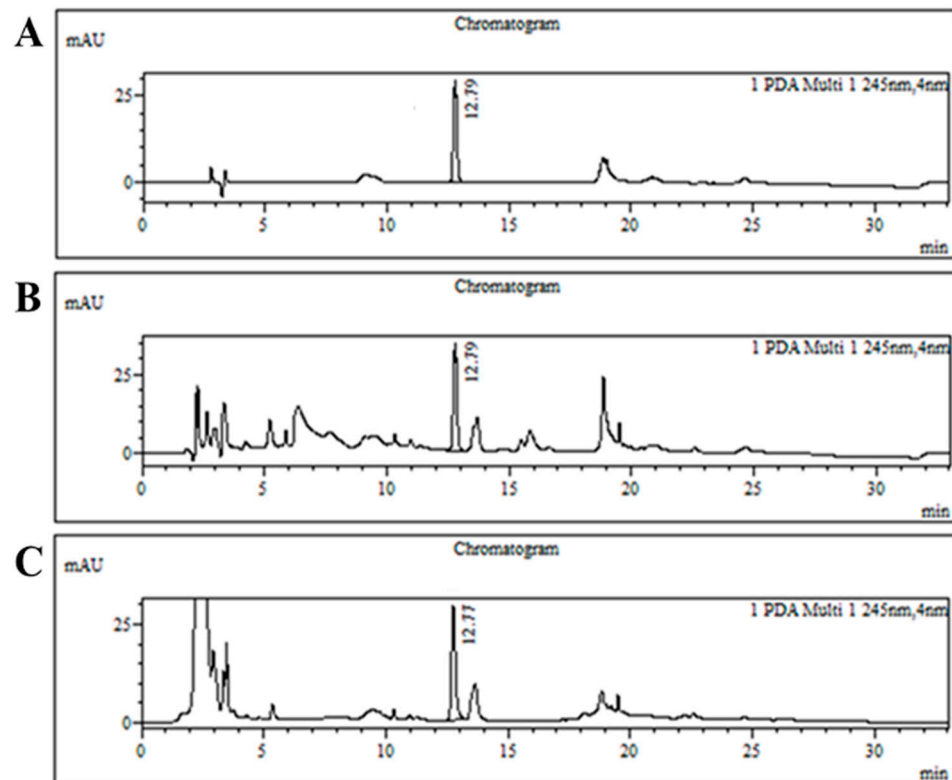

**Figure S2.** HPLC chromatograms of (A) ecdysterone marker compound, (B) USL 1% solution, and (C) F1.

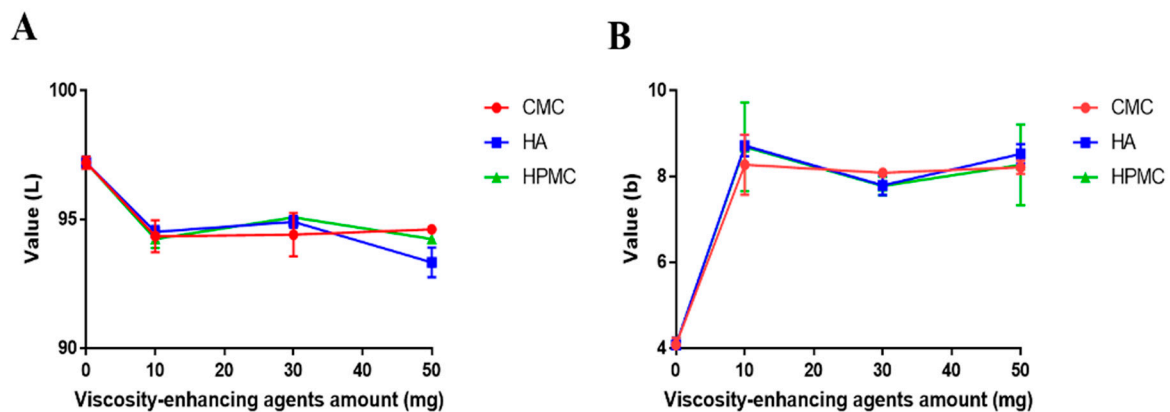

**Figure S3.** Pigmentation evaluation by measuring the color change on the egg shell membrane according to lubricants amount (A)  $L^*$  value, (B)  $b^*$  value.

**Table S1.** The compatibility with additives data and stability evaluation of formulations in 40°C oven storage for 3 weeks

|                                         | <b>Ecdysterone content</b> | <b>Transmittance (600 nm)</b> |
|-----------------------------------------|----------------------------|-------------------------------|
| <b>1% USL and 0.3% HA</b>               | 100.3 ± 0.4%               | 98.8 ± 0.1%                   |
| <b>1% USL and 0.3% HPMC</b>             | 99.8 ± 0.2%                | 98.8 ± 0.5%                   |
| <b>1% USL and 0.5% CMC</b>              | 99.9 ± 0.8%                | 98.8 ± 0.3%                   |
| <b>1% USL and 0.9% NaCl</b>             | 99.1 ± 0.3%                | 98.6 ± 0.2%                   |
| <b>1% USL and 0.5% phosphate buffer</b> | 99.8 ± 0.6%                | 99.2 ± 0.3%                   |
| <b>1% USL and 0.01% BZK</b>             | 99.3 ± 0.2%                | 82.2 ± 1.6%                   |
| <b>F1</b>                               | 99.6 ± 1.3%                | 99.5 ± 0.2%                   |
| <b>F2</b>                               | 100.3 ± 0.5%               | 98.7 ± 0.2%                   |
| <b>F3</b>                               | 99.5 ± 1.0%                | 99.1 ± 0.2%                   |
| <b>F4</b>                               | 99.1 ± 0.2%                | 99.3 ± 0.2%                   |

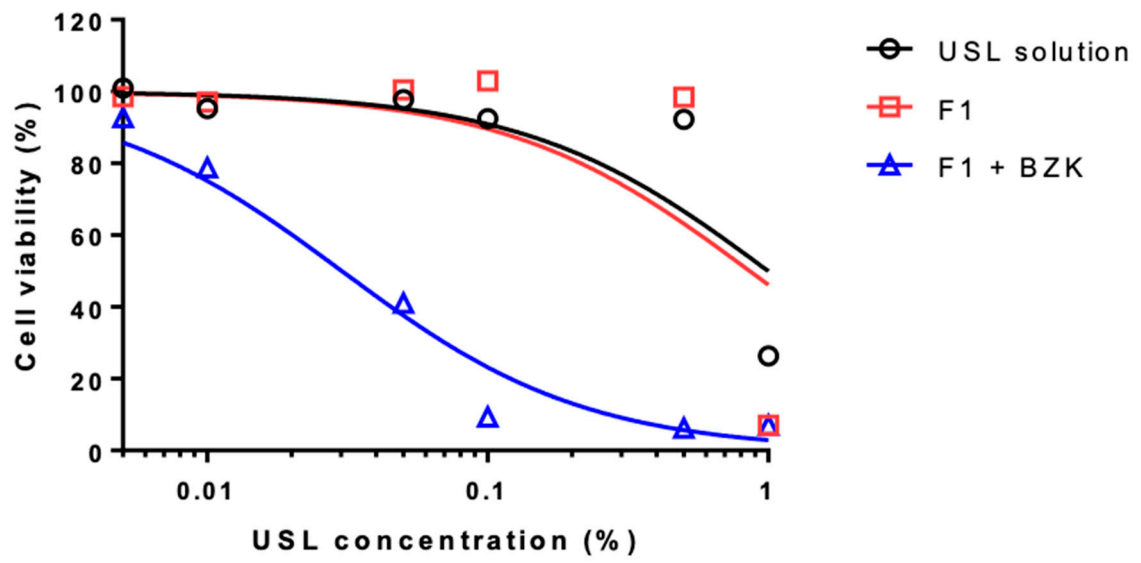

**Figure S4.** Cytotoxicity of USL, F1 and F1 + BZK in conjunctival epithelial cell for 12 h.

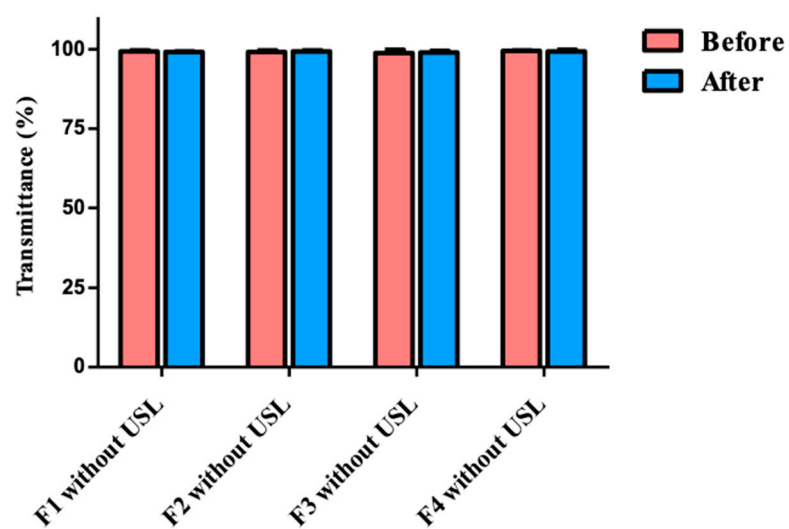

**Figure S5.** Stability evaluation of precipitation after thermal condition (121°C, 30 min) of each formulation without USL (n=3).
